# Supplementary material for: Risks of ovarian, breast, and corpus uteri cancer in women treated with assisted reproductive technology in Great Britain, 1991-2010: data linkage study including 2.2 million person years of observation
Source: PubMed Central journal article supplement (PMC6039832; doi:10.1136/bmj.k2644), 2018-07-11
Supplement: wilc043336.ww.pdf [file wilc043336.ww.pdf]

## Supplementary appendix

Figure S1- Flow diagram of cohort records

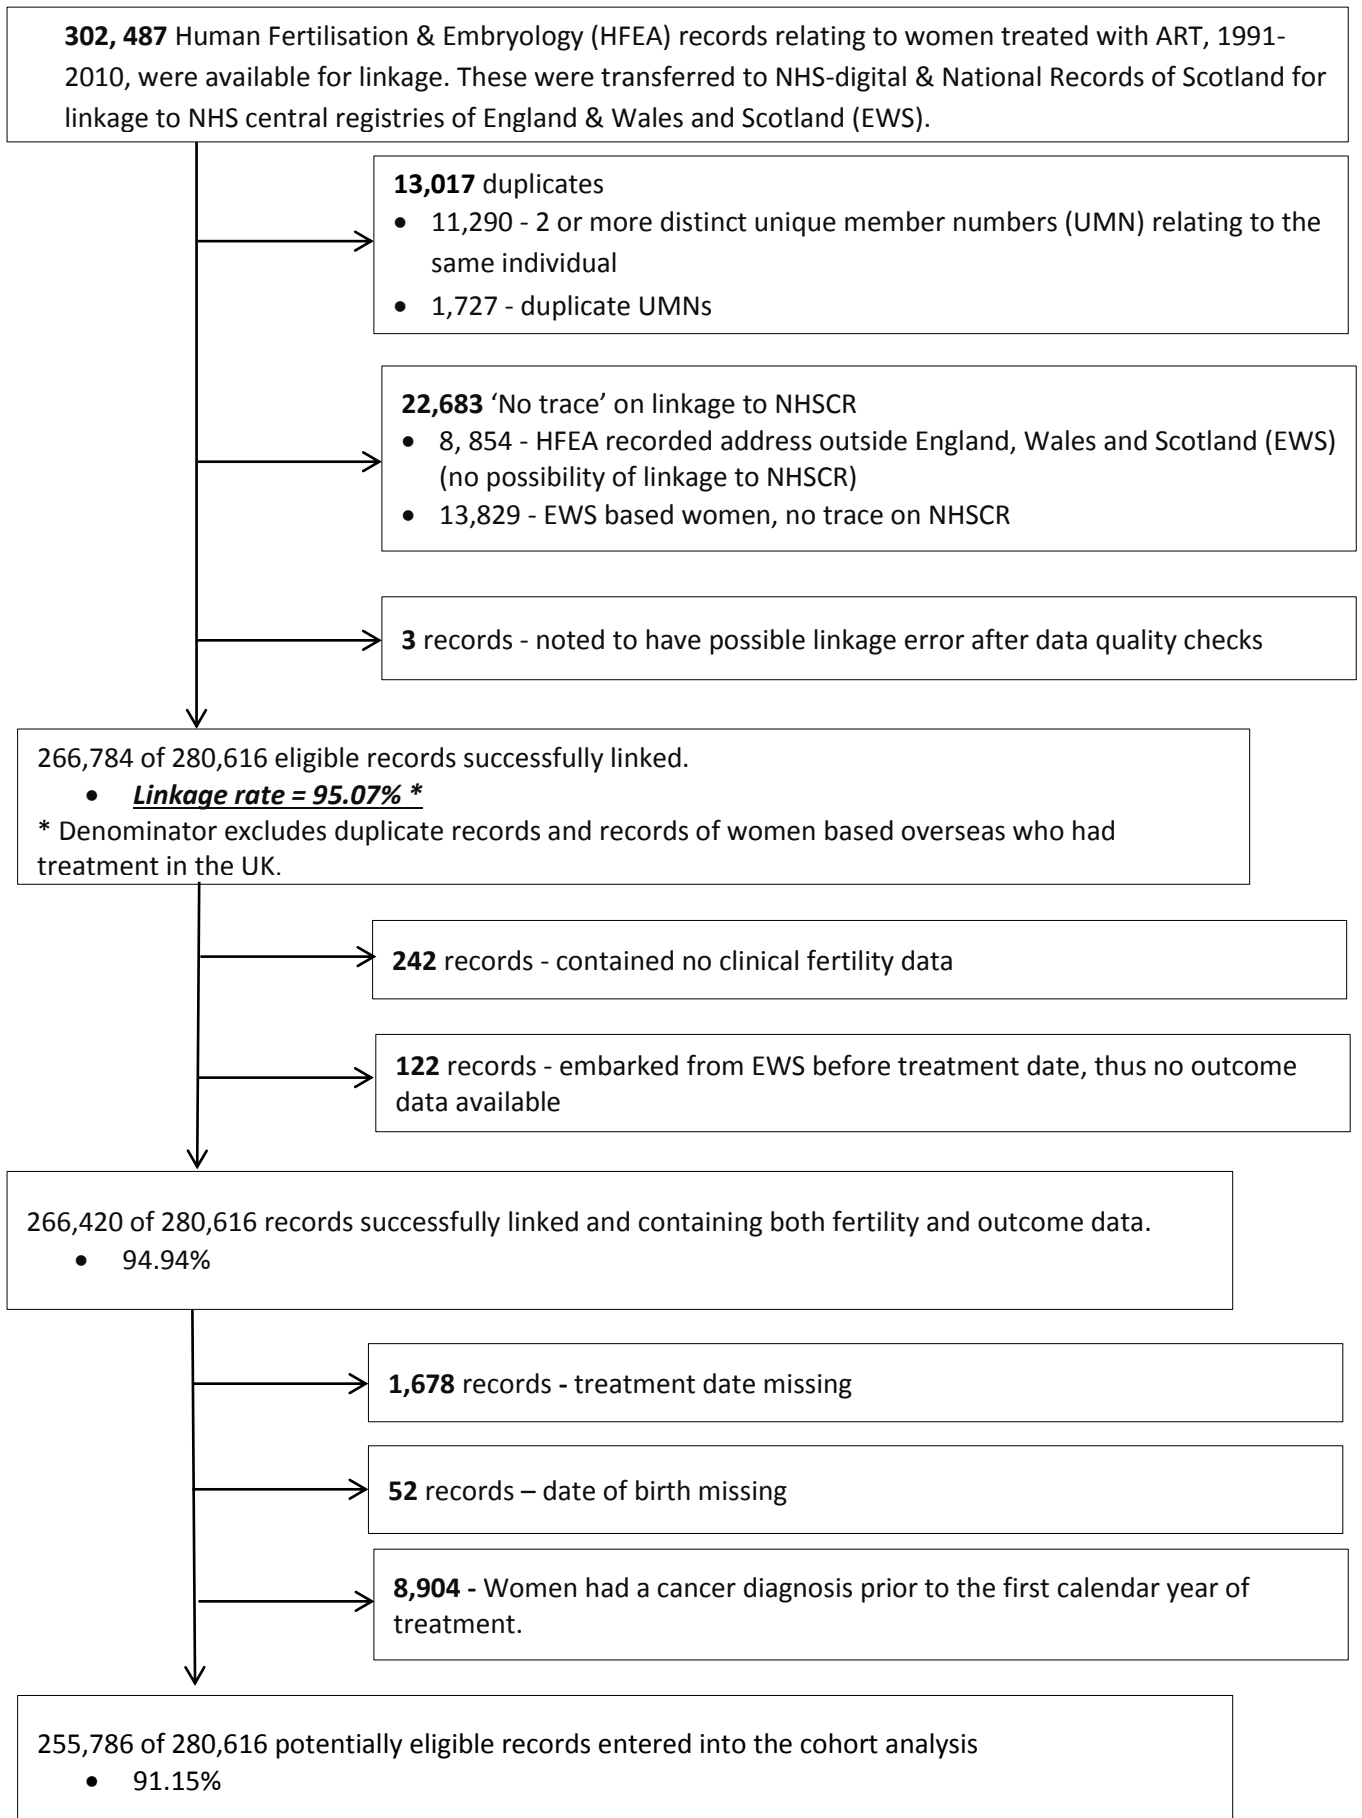

### Box S1- Details of linkage & analysis

#### Details of linkage at National Health Service-Digital and National Records for Scotland

Matching was initially deterministic, matching on:-

- Forename, Surname
- 2 of 3 parts of date of birth match

If more than one match was found no match was accepted and the records would go for manual matching along with unmatched records. Manual matching utilised: -

- Forename, Surname, Date of birth
- Other recorded names
- Place of birth
- Treatment centre/ Cycle date

#### Quality control process: -

Automatic matching algorithm used (A) was tested against an algorithm using exact date of birth match (B). Both A and B were performed on 4239 cases. The 4239 cases then underwent manual matching gold standard.

A – 0/4239 false positive matches

B – 9/4239 false positive matches

#### Additional details of analysis: -

As detailed in the main paper, expected cancers were calculated by multiplying person-years at risk by corresponding national incidence rates (by 5-year age band and individual calendar year) for the general population of England & Wales. Annual national incidence rates 1991-1998 are for England and Wales, thereafter national rates refer to England only as rates were not published for England and Wales.

**Table S1. Meta-data for available HFEA variables (linked cohort)**

| HFEA data item                             | Frequency | Details                                                                                                                                                                                                          | Data Source                                             | % complete |
|--------------------------------------------|-----------|------------------------------------------------------------------------------------------------------------------------------------------------------------------------------------------------------------------|---------------------------------------------------------|------------|
| <b>Date of Birth</b>                       | 255,786   |                                                                                                                                                                                                                  | Self-reported to HFEA                                   | 100        |
| <b>Ethnic group</b>                        | 46,107    | 30 potential responses                                                                                                                                                                                           | Self-reported to HFEA                                   | 18.0       |
| <b>Start date of first treatment cycle</b> | 255,786   | Year of each treatment cycle recorded. Year mid-point used to calculate person-years at risk.                                                                                                                    | Clinic reported to HFEA                                 | 100        |
| <b>Start date of last treatment cycle</b>  | 255,786   |                                                                                                                                                                                                                  | Clinic reported to HFEA                                 | 100        |
| <b>Age at first treatment</b>              | 255,786   | Categorised: -<br><25 yrs- 5,671<br>25-29 yrs- 39,932<br>30-34 yrs- 92,788<br>35-39 yrs- 85,868<br>40-44 yrs- 28,174<br>45+yrs – 3,353                                                                           | Derived, first treatment cycle date minus date of birth | 100        |
| <b>Broad Cause of infertility</b>          | 244,286   | Female- 70,293<br>Male- 84,871<br>Both- 41,365<br>Unexplained- 47,757<br>Unrecorded- 11,500 & all specific causes negative.                                                                                      | Clinic reported to HFEA                                 | 95.5       |
| <b>Endometriosis</b>                       | 255,786   | Yes- 18,630<br>No- 237,156                                                                                                                                                                                       | Clinic reported to HFEA                                 | 100        |
| <b>Tubal disease</b>                       | 255,786   | Yes- 66,370<br>No- 189,416                                                                                                                                                                                       | Clinic reported to HFEA                                 | 100        |
| <b>Ovulatory disorder</b>                  | 255,786   | Yes- 36,016<br>No- 219,770                                                                                                                                                                                       | Clinic reported to HFEA                                 | 100        |
| <b>Male factor infertility</b>             | 255,786   | Any Yes-126,236 No-129,550<br>Sperm concentration<br>Yes- 18,679 No-237,107<br>Sperm morphology<br>Yes-10,586 No-245,200<br>Sperm motility<br>Yes-9,263 No-246,523<br>Sperm immune issue<br>Yes-2,493 No-253,293 | Clinic reported to HFEA                                 |            |
| <b>Primary Female infertility</b>          | 255,576   | Yes-113,918<br>No- 141,658<br>Unrecorded-210                                                                                                                                                                     | Clinic reported to HFEA                                 | 99.9       |
| <b>Secondary Female Infertility</b>        | 255,786   | Yes-86,322<br>No-169,464                                                                                                                                                                                         | Clinic reported to HFEA                                 | 100        |
| <b>Primary Male Infertility</b>            | 255,786   | Yes-117,207<br>No-138,579                                                                                                                                                                                        | Clinic reported to HFEA                                 | 100        |
| <b>Secondary Male Infertility</b>          | 255,786   | Yes-80,843<br>No-174,943                                                                                                                                                                                         | Clinic reported to HFEA                                 | 100        |
| <b>Primary Couple infertility</b>          | 255,786   | Yes-139,272<br>No-116,514                                                                                                                                                                                        | Clinic reported to HFEA                                 | 100        |
| <b>Secondary Couple infertility</b>        | 255,786   | Yes-58,584<br>No-197,202                                                                                                                                                                                         | Clinic reported to HFEA                                 | 100        |
| <b>Duration of infertility</b>             | 206,304   | <2yrs- 17,194<br>2-3yrs- 67,529<br>4-5yrs- 56,203<br>6-7yrs- 29,946<br>8-9yrs - 15,394<br>>=10yrs -20,038<br>Unrecorded- 49,482                                                                                  | Self-reported to HFEA                                   | 80.6       |

|                                                             |         |                                                                                                                          |                                                                                                                                                                                                                                |      |
|-------------------------------------------------------------|---------|--------------------------------------------------------------------------------------------------------------------------|--------------------------------------------------------------------------------------------------------------------------------------------------------------------------------------------------------------------------------|------|
| <b>Number of Treatment cycles</b>                           | 255,778 | Natural cycle only-9,781<br>Stimulated cycles-<br>1- 131,670<br>2- 63,842<br>3-4- 41,224<br>5+ - 9,261<br>Unrecorded - 8 | Clinic reported to HFEA                                                                                                                                                                                                        | 99.9 |
| <b>Type of ART treatment</b>                                | 255,177 | IVF only- 150,700<br>ICSI/ Unspecified micromanipulation- 76, 596<br>IVF & ICSI- 27,881                                  | Clinic reported to HFEA                                                                                                                                                                                                        | 99.8 |
| <b>Treatment centre</b>                                     | 255,786 | Treatment centre only geographical variable available                                                                    | Clinic reported to HFEA                                                                                                                                                                                                        | 100  |
| <b>Number of Pregnancies by end of last treatment cycle</b> | 255,377 | 0- 82,747<br>1- 94,836<br>2-3- 63,821<br>4-5- 11,246<br>6+ 2,727<br>Unknown - 409                                        | Derived variable from self - reported pregnancies on registration of last treatment cycle plus HFEA recorded ART pregnancies from last treatment cycle (validated against HFEA recorded ART pregnancies from previous cycles). | 99.8 |
| <b>Years since last pregnancy</b>                           | 121,698 | Variable contains a number of values which are likely to be age at last pregnancy.                                       | Self-reported to HFEA                                                                                                                                                                                                          | 47.6 |
| <b>Age at last pregnancy</b>                                | 121,698 | Median- 31.7 yrs<br>IQR 35.5-27.7 yrs                                                                                    | Self-reported to HFEA                                                                                                                                                                                                          | 47.6 |
| <b>Number of live births by end of last treatment cycle</b> | 255,701 | 0- 129,217<br>1- 96,839<br>2-3- 27,593<br>4+ 2,052<br>Unrecorded- 85                                                     | Derived variable from self - reported births on registration of last treatment cycle plus HFEA recorded ART birth from last treatment cycle (validated against HFEA recorded ART births from previous cycles).                 | 99.9 |
| <b>Multiple births</b>                                      | 255,786 | Yes- 29,366<br>No- 29,366                                                                                                | Clinic reported to HFEA                                                                                                                                                                                                        | 100  |
| <b>ART birth recorded by HFEA</b>                           | 255,786 | Yes- 105,183<br>No-150,183                                                                                               | Clinic reported to HFEA                                                                                                                                                                                                        | 100  |

**Figure S2- Person years of follow up within the cohort of women who had assisted conception, by year of first treatment**

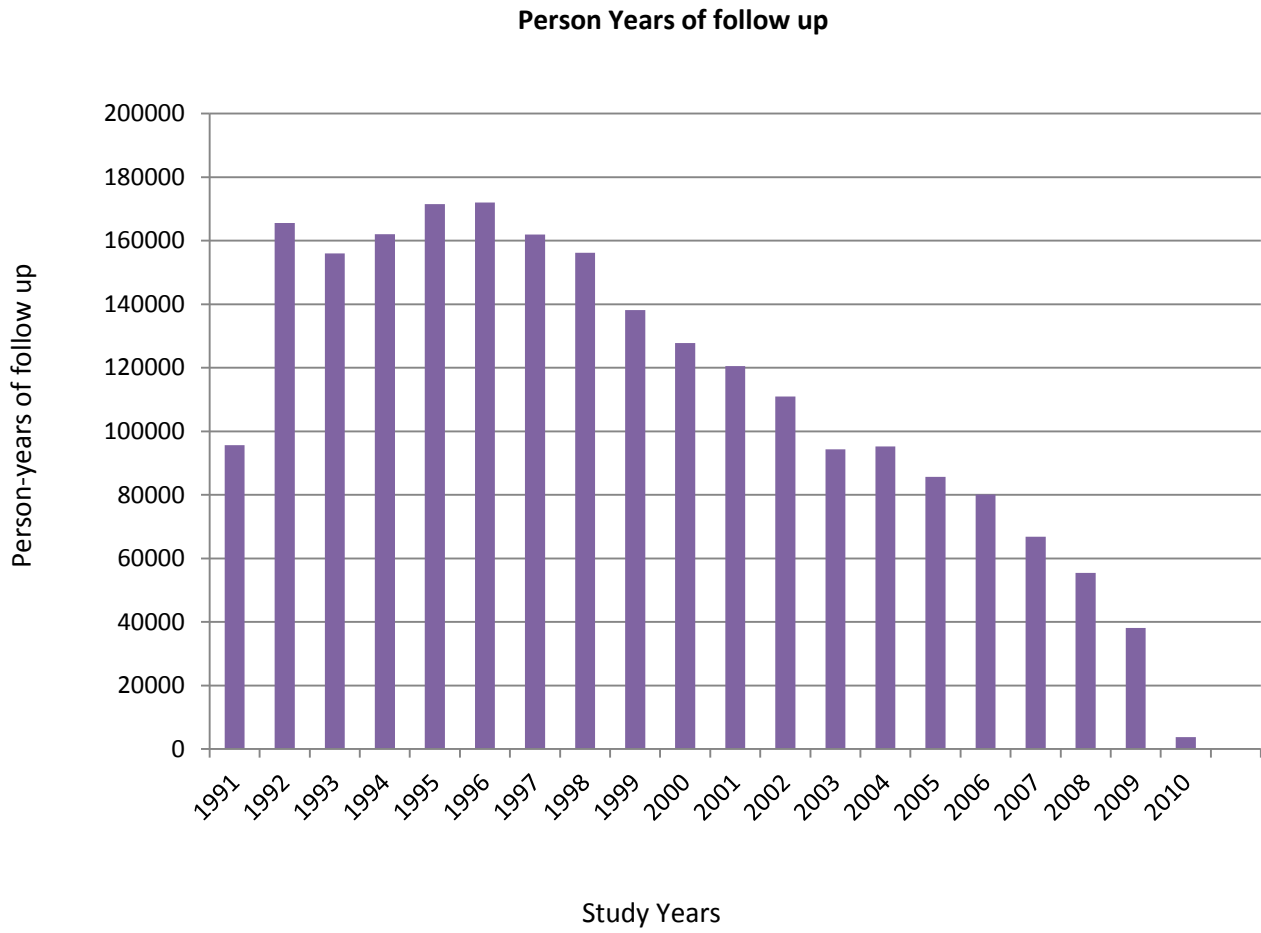

**Table S2- Cohort frequency and person years of follow up by year of first**

| <b>Year of first treatment</b> | <b>No. of women</b> | <b>%</b> | <b>Cumulative %</b> | <b>Person-years of follow-up</b> | <b>Person-years as % of total</b> | <b>Cumulative person years as % of cohort</b> |
|--------------------------------|---------------------|----------|---------------------|----------------------------------|-----------------------------------|-----------------------------------------------|
| 1991                           | 5,047               | 2.0      | 1.97                | 95654                            | 4.2                               | 4.2                                           |
| 1992                           | 9,169               | 3.6      | 5.56                | 165557                           | 7.3                               | 11.6                                          |
| 1993                           | 9,095               | 3.6      | 9.11                | 155957                           | 6.9                               | 18.5                                          |
| 1994                           | 9,996               | 3.9      | 13.02               | 162009                           | 7.2                               | 25.7                                          |
| 1995                           | 11,216              | 4.4      | 17.41               | 171479                           | 7.6                               | 33.3                                          |
| 1996                           | 12,004              | 4.7      | 22.10               | 172036                           | 7.6                               | 40.9                                          |
| 1997                           | 12,124              | 4.7      | 26.84               | 161905                           | 7.2                               | 48.1                                          |
| 1998                           | 12,578              | 4.9      | 31.76               | 156201                           | 6.9                               | 55.0                                          |
| 1999                           | 12,058              | 4.7      | 36.47               | 138110                           | 6.1                               | 61.1                                          |
| 2000                           | 12,149              | 4.8      | 41.22               | 127788                           | 5.7                               | 66.8                                          |
| 2001                           | 12,622              | 4.9      | 46.15               | 120568                           | 5.3                               | 72.1                                          |
| 2002                           | 12,932              | 5.1      | 51.21               | 110950                           | 4.9                               | 77.0                                          |
| 2003                           | 12,414              | 4.9      | 56.06               | 94329                            | 4.2                               | 81.2                                          |
| 2004                           | 14,368              | 5.6      | 61.68               | 95264                            | 4.2                               | 85.4                                          |
| 2005                           | 15,144              | 5.9      | 67.60               | 85673                            | 3.8                               | 89.2                                          |
| 2006                           | 17,130              | 6.7      | 74.30               | 80136                            | 3.6                               | 92.7                                          |
| 2007                           | 18,070              | 7.1      | 81.36               | 66809                            | 3.0                               | 95.7                                          |
| 2008                           | 20,494              | 8.0      | 89.38               | 55464                            | 2.5                               | 98.2                                          |
| 2009                           | 22,068              | 8.6      | 98.00               | 38141                            | 1.7                               | 99.9                                          |
| 2010                           | 5,108               | 2.0      | 100.00              | 3760                             | 0.2                               | 100.0                                         |
| Total                          | 255,786             | 100.0    | 100.00              | 2257789                          | 100.0                             | 100.0                                         |

**Table S3- Sensitivity analysis excluding the first 12 months of follow up for breast, corpus uteri and ovarian cancer**

| Factor                                                  | Person-years follow-up | Type of Cancer                    |                         |                                   |                        |                                    |                        |
|---------------------------------------------------------|------------------------|-----------------------------------|-------------------------|-----------------------------------|------------------------|------------------------------------|------------------------|
|                                                         |                        | Breast <sup>†</sup>               |                         | Corpus Uteri <sup>§</sup>         |                        | Ovarian <sup>  </sup>              |                        |
|                                                         |                        | Observed Cancers                  | SIR (95%CI)             | Observed Cancers                  | SIR (95%CI)            | Observed Cancers                   | SIR (95%CI)            |
| Overall                                                 | 2,004,121              | 2384                              | 0.95<br>(0.92 to 0.99)  | 157                               | 1.12<br>(0.94 to 1.30) | 356                                | 1.31<br>(1.18 to 1.45) |
| Age at first treatment (years)                          |                        |                                   |                         |                                   |                        |                                    |                        |
| <25                                                     | 42,574                 | 11                                | 1.05<br>(0.53 to 1.88)  | 0                                 | 0.00<br>(0.00 to 7.13) | <5                                 | #                      |
| 25 to 29                                                | 342,334                | 171                               | 0.87<br>(0.74 to 1.01)  | 8                                 | 1.01<br>(0.44 to 2.00) | 55                                 | 1.99<br>(1.50 to 2.59) |
| 30-34                                                   | 774,230                | 723                               | 0.92<br>(0.86 to 0.99)* | 41                                | 1.16<br>(0.83 to 1.58) | 124                                | 1.42<br>(1.18 to 1.69) |
| 35-39                                                   | 628,952                | 955                               | 0.95<br>(0.89 to 1.02)  | 70                                | 1.23<br>(0.96 to 1.55) | 118                                | 1.16<br>(0.96 to 1.39) |
| 40-44                                                   | 190,890                | 436                               | 1.01<br>(0.92 to 1.11)  | 32                                | 0.97<br>(0.67 to 1.37) | 47                                 | 1.07<br>(0.78 to 1.42) |
| 45+                                                     | 25,142                 | 88                                | 1.13<br>(0.91 to 1.39)  | 6                                 | 0.71<br>(0.26 to 1.56) | <10                                | #                      |
|                                                         |                        | Trend across categories<br>P=0.03 |                         | Trend across categories<br>P=0.54 |                        | Trend across categories<br>P=0.001 |                        |
| Infertility cause                                       |                        |                                   |                         |                                   |                        |                                    |                        |
| Any female factor                                       | 998,634                | 1224                              | 0.95<br>(0.90 to 1.00)  | 95                                | 1.26<br>(1.02 to 1.54) | 221                                | 1.58<br>(1.38 to 1.81) |
| Male factor only                                        | 672,834                | 727                               | 0.91<br>(0.85 to 0.98)  | 40                                | 0.92<br>(0.66 to 1.25) | 88                                 | 1.01<br>(0.81 to 1.24) |
| Unexplained                                             | 279,249                | 377                               | 1.08<br>(0.98 to 1.20)  | 16                                | 0.83<br>(0.47 to 1.35) | 33                                 | 0.88<br>(0.60 to 1.23) |
| Unrecorded                                              | 53,406                 | 56                                | 0.87<br>(0.66 to 1.13)  | 6                                 | 1.67<br>(0.61 to 3.64) | 14                                 | 1.98<br>(1.08 to 3.33) |
| History of endometriosis                                |                        |                                   |                         |                                   |                        |                                    |                        |
| Yes                                                     | 162,795                | 204                               | 0.98<br>(0.85 to 1.12)  | 9                                 | 0.78<br>(0.35 to 1.47) | 49                                 | 2.19<br>(1.62 to 2.89) |
| No                                                      | 1,841,327              | 2180                              | 0.95<br>(0.91 to 0.99)  | 148                               | 1.14<br>(0.96 to 1.34) | 307                                | 1.23<br>(1.10 to 1.38) |
| History of tubal disease                                |                        |                                   |                         |                                   |                        |                                    |                        |
| Yes                                                     | 644,518                | 800                               | 0.97<br>(0.90 to 1.04)  | 57                                | 1.21<br>(0.92 to 1.57) | 151                                | 1.69<br>(1.44 to 1.99) |
| No                                                      | 1,359,603              | 1584                              | 0.95<br>(0.90 to 0.99)  | 100                               | 1.06<br>(0.86 to 1.28) | 205                                | 1.12<br>(0.97 to 1.29) |
| History of ovulatory problems                           |                        |                                   |                         |                                   |                        |                                    |                        |
| Yes                                                     | 275,753                | 333                               | 0.91<br>(0.82 to 1.02)  | 38                                | 1.65<br>(1.17 to 2.27) | 43                                 | 1.08<br>(0.78 to 1.45) |
| No                                                      | 1,728,369              | 2051                              | 0.96<br>(0.92 to 1.00)  | 119                               | 1.00<br>(0.83 to 1.20) | 313                                | 1.35<br>(1.20 to 1.51) |
| Duration of infertility at last treatment cycle (years) |                        |                                   |                         |                                   |                        |                                    |                        |
| < 2                                                     | 116,371                | 142                               | 0.84<br>(0.71 to 1.00)  | <5                                | ### *                  | 23                                 | 1.26<br>(0.82 to 1.93) |
| 2-3                                                     | 373,788                | 481                               | 1.04<br>(0.95 to 1.14)  | 22                                | 0.83<br>(0.52 to 1.26) | 62                                 | 1.23<br>(0.94 to 1.57) |
| 4-5                                                     | 392,584                | 498                               | 1.00<br>(0.92 to 1.10)  | 30                                | 1.07<br>(0.73 to 1.54) | 66                                 | 1.23<br>(0.95 to 1.57) |
| 6-7                                                     | 242,061                | 298                               | 0.91<br>(0.81 to 1.02)  | 27                                | 1.43<br>(0.94 to 2.07) | 57                                 | 1.63<br>(1.24 to 2.12) |
| 8-9                                                     | 136,379                | 185                               | 0.94<br>(0.81 to 1.08)  | 16                                | 1.38<br>(0.79 to 2.24) | 33                                 | 1.60<br>(1.10 to 2.24) |

|                                                      |           |                                   |                         |                                    |                         |                                |                         |
|------------------------------------------------------|-----------|-----------------------------------|-------------------------|------------------------------------|-------------------------|--------------------------------|-------------------------|
| 10+                                                  | 189,948   | 305                               | 0.94<br>(0.84 to 1.05)  | 37                                 | 1.72<br>(1.21 to 2.38)  | 50                             | 1.49<br>(1.10 to 1.96)  |
| Unrecorded                                           | 275,893   | 360                               | 1.06<br>(0.95 to 1.17)  | <20                                | #                       | 36                             | 0.99<br>(0.69 to 1.37)  |
|                                                      |           | Trend across categories<br>P=0.47 |                         | Trend across categories<br>P<0.001 |                         | Trend across categories P=0.13 |                         |
| Total number of stimulated cycles                    |           |                                   |                         |                                    |                         |                                |                         |
| 0 – ‘natural cycle’ only                             | 81,304    | 136                               | 0.90<br>(0.76 to 1.07)  | 8                                  | 0.68<br>(0.30 to 1.35)  | 15                             | 0.94<br>(0.53 to 1.55)  |
| 1                                                    | 912,394   | 1107                              | 0.96<br>(0.90 to 1.01)  | 85                                 | 1.29<br>(1.03 to 1.59)  | 174                            | 1.39<br>(1.19 to 1.61)  |
| 2                                                    | 410,483   | 545                               | 1.01<br>(0.93 to 1.10)  | 29                                 | 0.95<br>(0.64 to 1.37)  | 77                             | 1.33<br>(1.05 to 1.67)  |
| 3-4                                                  | 265,687   | 381                               | 1.01<br>(0.91 to 1.11)  | 24                                 | 1.12<br>(0.72 to 1.66)  | 48                             | 1.22<br>(0.90 to 1.61)  |
| 5+                                                   | 57,107    | 100                               | 1.10<br>(0.90 to 1.34)  | 5                                  | 0.94<br>(0.31 to 2.19)  | 13                             | 1.41<br>(0.75 to 2.41)  |
| Unrecorded                                           | 50        | 0                                 | 0.00<br>(0.0 to 33.29)  | 0                                  | 0.00<br>(0.0 to 299.57) | 0                              | 0.00<br>(0.0 to 299.57) |
|                                                      |           | Trend across categories<br>P=0.13 |                         | Trend across categories<br>P=0.81  |                         | Trend across categories P=0.95 |                         |
| Total number of live births at last cycle completion |           |                                   |                         |                                    |                         |                                |                         |
| 0                                                    | 882,844   | 1166                              | 0.95<br>(0.89 to 1.00)  | 116                                | 1.60<br>(1.32 to 1.92)  | 189                            | 1.45<br>(1.25 to 1.67)  |
| 1                                                    | 623,485   | 801                               | 1.04<br>(0.97 to 1.12)  | 24                                 | 0.56<br>(0.36 to 0.83)  | 109                            | 1.31<br>(1.07 to 1.58)  |
| 2+                                                   | 220,364   | 301                               | 0.94<br>(0.84 to 1.05)  | 11                                 | 0.56<br>(0.28 to 1.00)  | 29                             | 0.86<br>(0.57 to 1.23)  |
| Unrecorded                                           | 332       | 1                                 | 2.13<br>(0.05 to 11.86) | 0                                  | 0.00<br>(0.0 to 99.86)  | 0                              | 0.00<br>(0.0 to 59.92)  |
|                                                      |           | Trend across categories<br>P=0.48 |                         | Trend across categories<br>P<0.001 |                         | Trend across categories P=0.01 |                         |
| Multiple birth as recorded at last cycle completion  |           |                                   |                         |                                    |                         |                                |                         |
| Yes                                                  | 203,766   | 253                               | 1.15<br>(1.01 to 1.30)  | 5                                  | 0.44<br>(0.14 to 1.03)  | 31                             | 1.26<br>(0.86 to 1.79)  |
| No                                                   | 1,523,258 | 2016                              | 0.96<br>(0.92 to 1.00)  | 146                                | 1.18<br>(1.00 to 1.39)  | 296                            | 1.33<br>(1.18 to 1.49)  |
| Time since last treatment (years)                    |           |                                   |                         |                                    |                         |                                |                         |
| 0-3                                                  | 435,973   | 337                               | 0.99<br>(0.88 to 1.10)  | 22                                 | 1.58<br>(0.99 to 2.39)  | 56                             | 1.32<br>(1.00 to 1.71)  |
| 3-6                                                  | 486,191   | 529                               | 1.04<br>(0.95 to 1.13)  | 29                                 | 1.28<br>(0.85 to 1.83)  | 73                             | 1.27<br>(1.00 to 1.60)  |
| 6-10                                                 | 444,324   | 657                               | 1.00<br>(0.93 to 1.08)  | 38                                 | 1.07<br>(0.76 to 1.47)  | 84                             | 1.24<br>(0.99 to 1.53)  |
| 10-15                                                | 296,445   | 590                               | 0.93<br>(0.86 to 1.01)  | 45                                 | 0.99<br>(0.72 to 1.33)  | 86                             | 1.39<br>(1.11 to 1.71)  |
| 15+                                                  | 64,091    | 156                               | 0.86<br>(0.73 to 1.01)  | 17                                 | 0.98<br>(0.57 to 1.57)  | 28                             | 1.57<br>(1.04 to 2.27)  |
|                                                      |           | Trend across categories<br>P=0.06 |                         | Trend across categories<br>P=0.06  |                         | Trend across categories P=0.46 |                         |



**Table S4- Sensitivity analysis excluding the first 12 months of follow up for invasive and borderline ovarian tumours**

| Factor                                                  | Person-years follow-up | Invasive Ovarian Tumours <sup>SS</sup> |                                | Borderline Ovarian Tumours <sup>IIII</sup> |                                |  |
|---------------------------------------------------------|------------------------|----------------------------------------|--------------------------------|--------------------------------------------|--------------------------------|--|
|                                                         |                        | Observed Cancers                       | SIR (95%CI)                    | Observed Cancers                           | SIR (95%CI)                    |  |
| Overall                                                 | 2,004,121              | 244                                    | 1.37<br>(1.21 to 1.56)         | 112                                        | 1.19<br>(0.98 to 1.43)         |  |
| Age at first treatment (years)                          |                        |                                        |                                |                                            |                                |  |
| <25                                                     | 42,574                 | <5                                     | #                              | <5                                         | #                              |  |
| 25-29                                                   | 342,334                | 32                                     | 2.24<br>(1.53 to 3.16)         | 23                                         | 1.72<br>(1.09 to 2.58)         |  |
| 30-34                                                   | 774,230                | 76                                     | 1.44<br>(1.13 to 1.80)         | 48                                         | 1.39<br>(1.02 to 1.84)         |  |
| 35-39                                                   | 628,952                | 87                                     | 1.25<br>(1.01 to 1.55)         | 31                                         | 0.96<br>(0.65 to 1.37)         |  |
| 40-44                                                   | 190,890                | 39                                     | 1.17<br>(0.83 to 1.60)         | 8                                          | 0.74<br>(0.32 to 1.46)         |  |
| 45+                                                     | 25,142                 | <10                                    | #                              | <5                                         | #                              |  |
|                                                         |                        |                                        | Trend across categories P=0.01 |                                            | Trend across categories P=0.01 |  |
| Infertility cause                                       |                        |                                        |                                |                                            |                                |  |
| Any female factor                                       | 998,634                | 155                                    | 1.67<br>(1.42 to 1.96)         | 66                                         | 1.40<br>(1.09 to 1.79)         |  |
| Male factor only                                        | 672,834                | 60                                     | 1.06<br>(0.81 to 1.37)         | 28                                         | 0.90<br>(0.60 to 1.30)         |  |
| Unexplained                                             | 279,249                | 20                                     | 0.82<br>(0.50 to 1.27)         | 13                                         | 0.98<br>(0.52 to 1.67)         |  |
| Unrecorded                                              | 53,406                 | 9                                      | 1.99<br>(0.91 to 3.78)         | 5                                          | 1.98<br>(0.64 to 4.61)         |  |
| History of endometriosis                                |                        |                                        |                                |                                            |                                |  |
| Yes                                                     | 162,795                | 37                                     | 2.51<br>(1.77 to 3.47)         | 12                                         | 1.57<br>(0.81 to 2.73)         |  |
| No                                                      | 1,841,327              | 207                                    | 1.27<br>(1.10 to 1.45)         | 100                                        | 1.16<br>(0.94 to 1.41)         |  |
| History of tubal disease                                |                        |                                        |                                |                                            |                                |  |
| Yes                                                     | 644,518                | 101                                    | 1.72<br>(1.40 to 2.09)         | 50                                         | 1.65<br>(1.23 to 2.18)         |  |
| No                                                      | 1,359,603              | 143                                    | 1.20<br>(1.01 to 1.42)         | 62                                         | 0.97<br>(0.75 to 1.25)         |  |
| History of ovulatory problems                           |                        |                                        |                                |                                            |                                |  |
| Yes                                                     | 275,753                | 32                                     | 1.19<br>(0.82 to 1.61)         | 11                                         | 0.84<br>(0.42 to 1.51)         |  |
| No                                                      | 1,728,369              | 212                                    | 1.40<br>(1.22 to 1.61)         | 101                                        | 1.25<br>(1.02 to 1.52)         |  |
| Duration of infertility at last treatment cycle (years) |                        |                                        |                                |                                            |                                |  |
| < 2                                                     | 116,371                | 15                                     | 1.23<br>(0.69 to 2.02)         | 8                                          | 1.41<br>(0.61 to 2.79)         |  |
| 2-3                                                     | 373,788                | 47                                     | 1.43<br>(1.05 to 1.90)         | 15                                         | 0.85<br>(0.48 to 1.41)         |  |
| 4-5                                                     | 392,584                | 49                                     | 1.40<br>(1.03 to 1.85)         | 17                                         | 0.92<br>(0.54 to 1.47)         |  |
| 6-7                                                     | 242,061                | 39                                     | 1.67<br>(1.19 to 2.29)         | 18                                         | 1.55<br>(0.92 to 2.45)         |  |
| 8-9                                                     | 136,379                | 25                                     | 1.78<br>(1.15 to 2.63)         | 8                                          | 1.21<br>(0.52 to 2.37)         |  |

|                                                      |           |     |                                |                                |                         |
|------------------------------------------------------|-----------|-----|--------------------------------|--------------------------------|-------------------------|
| 10+                                                  | 189,948   | 35  | 1.46<br>(1.02 to 2.03)         | 15                             | 1.55<br>(0.87 to 2.55)  |
| Unrecorded                                           | 275,893   | 21  | 0.90<br>(0.56 to 1.38)         | 15                             | 1.13<br>(0.63 to 1.87)  |
|                                                      |           |     | Trend across categories P=0.39 | Trend across categories P=0.17 |                         |
| Total number of stimulated cycles                    |           |     |                                |                                |                         |
| 0 – ‘natural cycle’ only                             | 81,304    | 13  | 1.11<br>(0.59 to 1.90)         | <5                             | #                       |
| 1                                                    | 912,394   | 118 | 1.43<br>(1.19 to 1.72)         | 56                             | 1.30<br>(0.98 to 1.69)  |
| 2                                                    | 410,483   | 50  | 1.32<br>(0.98 to 1.73)         | 27                             | 1.37<br>(0.90 to 1.99)  |
| 3-4                                                  | 265,687   | 39  | 1.48<br>(1.05 to 2.02)         | 9                              | 0.69<br>(0.32 to 1.31)  |
| 5+                                                   | 57,107    | 11  | 1.74<br>(0.87 to 3.11)         | <5                             | #                       |
|                                                      |           |     | Trend across categories P=0.48 | Trend across categories P=0.30 |                         |
| Total number of live births at last cycle completion |           |     |                                |                                |                         |
| 0                                                    | 882,844   | 136 | 1.55<br>(1.30 to 1.84)         | 53                             | 1.24<br>(0.93 to 1.62)  |
| 1                                                    | 623,485   | 77  | 1.42<br>(1.12 to 1.78)         | 32                             | 1.09<br>(0.75 to 1.54)  |
| 2+                                                   | 220,364   | 18  | 0.78<br>(0.46 to 1.23)         | 11                             | 1.01<br>(0.51 to 1.81)  |
| Unrecorded                                           | 332       | 0   | 0.00<br>(0.00 to 99.86)        | 0                              | 0.00<br>(0.00 to 149.8) |
|                                                      |           |     | Trend across categories P=0.01 | Trend across categories P=0.46 |                         |
| Multiple birth as recorded at last cycle completion  |           |     |                                |                                |                         |
| Yes                                                  | 203,766   | 21  | 1.37<br>(0.85 to 2.09)         | 10                             | 1.08<br>(0.52 to 1.99)  |
| No                                                   | 1,523,258 | 210 | 1.41<br>(1.22 to 1.61)         | 86                             | 1.17<br>(0.93 to 1.44)  |
| Time since last treatment (years)                    |           |     |                                |                                |                         |
| 0-3                                                  | 435,973   | 39  | 1.62<br>(1.15 to 2.21)         | 17                             | 0.93<br>(0.54 to 1.48)  |
| 3-6                                                  | 486,191   | 45  | 1.27<br>(0.93 to 1.71)         | 28                             | 1.27<br>(0.85 to 1.84)  |
| 6-10                                                 | 444,324   | 63  | 1.37<br>(1.05 to 1.75)         | 21                             | 0.96<br>(0.59 to 1.46)  |
| 10-15                                                | 296,445   | 63  | 1.38<br>(1.06 to 1.77)         | 23                             | 1.39<br>(0.88 to 2.08)  |
| 15+                                                  | 64,091    | 21  | 1.52<br>(0.94 to 2.32)         | 7                              | 1.75<br>(0.70 to 3.60)  |
|                                                      |           |     | Trend across categories P=0.85 | Trend across categories P=0.21 |                         |

**Table S5- Sensitivity analysis excluding the first 12 months of follow up for invasive and in-situ breast cancer**

| Factor                                                  | Person-years follow-up | Invasive breast cancer <sup>††</sup> |                        | In situ- breast cancer <sup>††</sup> |                        |
|---------------------------------------------------------|------------------------|--------------------------------------|------------------------|--------------------------------------|------------------------|
|                                                         |                        | Observed Cancers                     | SIR (95%CI)            | Observed Cancers                     | SIR (95%CI)            |
| Overall                                                 | 2,004,121              | 2089                                 | 0.93<br>(0.89 to 0.97) | 280                                  | 1.15<br>(1.02 to 1.29) |
| Age at first treatment (years)                          |                        |                                      |                        |                                      |                        |
| <25                                                     | 42,574                 | 11                                   | 1.14<br>(0.57 to 2.04) | 0                                    | 0.00<br>(0.00 to 4.41) |
| 25-29                                                   | 342,334                | 154                                  | 0.85<br>(0.72 to 1.00) | 16                                   | 1.12<br>(0.64 to 1.81) |
| 30-34                                                   | 774,230                | 635                                  | 0.89<br>(0.82 to 0.96) | 84                                   | 1.29<br>(1.03 to 1.59) |
| 35-39                                                   | 628,952                | 850                                  | 0.95<br>(0.89 to 1.02) | 97                                   | 0.95<br>(0.77 to 1.16) |
| 40-44                                                   | 190,890                | 373                                  | 0.99<br>(0.89 to 1.09) | 61                                   | 1.19<br>(0.91 to 1.53) |
| 45+                                                     | 25,142                 | 66                                   | 0.99<br>(0.76 to 1.26) | 22                                   | 2.06<br>(1.29 to 3.12) |
|                                                         |                        | Trend across categories P=0.07       |                        | Trend across categories P=0.67       |                        |
| Infertility cause                                       |                        |                                      |                        |                                      |                        |
| Any female factor                                       | 998,634                | 1068                                 | 0.93<br>(0.87 to 0.98) | 146                                  | 1.14<br>(0.96 to 1.34) |
| Male factor only                                        | 672834                 | 632                                  | 0.88<br>(0.81 to 0.95) | 90                                   | 1.18<br>(0.95 to 1.45) |
| Unexplained                                             | 279,249                | 337                                  | 1.08<br>(0.97 to 1.20) | <45                                  | #                      |
| Unrecorded                                              | 53,406                 | 52                                   | 0.90<br>(0.67 to 1.18) | <5                                   | #                      |
| History of endometriosis                                |                        |                                      |                        |                                      |                        |
| Yes                                                     | 162,795                | 176                                  | 0.94<br>(0.81 to 1.09) | 26                                   | 1.28<br>(0.84 to 1.88) |
| No                                                      | 1,841,327              | 1913                                 | 0.93<br>(0.89 to 0.97) | 254                                  | 1.13<br>(1.00 to 1.28) |
| History of tubal disease                                |                        |                                      |                        |                                      |                        |
| Yes                                                     | 644,518                | 701                                  | 0.95<br>(0.88 to 1.02) | 90                                   | 1.11<br>(0.89 to 1.36) |
| No                                                      | 1,359,603              | 1388                                 | 0.92<br>(0.87 to 0.97) | 190                                  | 1.17<br>(1.01 to 1.34) |
| History of ovulatory problems                           |                        |                                      |                        |                                      |                        |
| Yes                                                     | 275,753                | 294                                  | 0.90<br>(0.80 to 1.01) | 38                                   | 1.01<br>(0.72 to 1.39) |
| No                                                      | 1,728,369              | 1795                                 | 0.94<br>(0.89 to 0.98) | 242                                  | 1.17<br>(1.03 to 1.33) |
| Duration of infertility at last treatment cycle (years) |                        |                                      |                        |                                      |                        |
| < 2                                                     | 116,371                | 128                                  | 0.85<br>(0.71 to 1.02) | 14                                   | 0.80<br>(0.44 to 1.34) |
| 2-3                                                     | 373,788                | 422                                  | 1.02<br>(0.92 to 1.12) | 57                                   | 1.25<br>(0.95 to 1.63) |
| 4-5                                                     | 392,584                | 439                                  | 0.99<br>(0.90 to 1.08) | 52                                   | 1.08<br>(0.80 to 1.41) |
| 6-7                                                     | 242,061                | 260                                  | 0.88<br>(0.78 to 1.00) | 35                                   | 1.07<br>(0.75 to 1.49) |
| 8-9                                                     | 136,379                | 159                                  | 0.90<br>(0.77 to 1.06) | 25                                   | 1.25<br>(0.81 to 1.85) |

|                                                         |           |                                |                        |                                 |                           |
|---------------------------------------------------------|-----------|--------------------------------|------------------------|---------------------------------|---------------------------|
| 10+                                                     | 189,948   | 262                            | 0.91<br>(0.80 to 1.03) | 42                              | 1.19<br>(0.86 to 1.60)    |
| Unrecorded                                              | 275,893   | 311                            | 1.02<br>(0.91 to 1.14) | 48                              | 1.49<br>(1.10 to 1.97)    |
|                                                         |           | Trend across categories P=0.30 |                        | Trend across categories P=0.53  |                           |
| Total number of stimulated cycles                       |           |                                |                        |                                 |                           |
| 0 – ‘natural cycle’ only                                | 81,304    | 115                            | 0.87<br>(0.72 to 1.04) | 21                              | 1.20<br>(0.74 to 1.83)    |
| 1                                                       | 912,394   | 981                            | 0.95<br>(0.89 to 1.01) | 117                             | 1.03<br>(0.85 to 1.23)    |
| 2                                                       | 410,483   | 472                            | 0.97<br>(0.89 to 1.07) | 70                              | 1.32<br>(1.03 to 1.66)    |
| 3-4                                                     | 265,687   | 334                            | 0.99<br>(0.88 to 1.10) | 45                              | 1.19<br>(0.87 to 1.60)    |
| 5+                                                      | 57,107    | 79                             | 0.98<br>(0.77 to 1.22) | 20                              | 2.14<br>(1.31 to 3.31)    |
| Unrecorded                                              |           | 0                              | 0.00<br>(0.0 to 37.45) | 0                               | 0.00<br>(0.0 to 299.57)   |
|                                                         |           | Trend across categories P=0.27 |                        | Trend across categories P=0.03* |                           |
| Total number of live births at last cycle completion    |           |                                |                        |                                 |                           |
| 0                                                       | 882,844   | 1027                           | 0.94<br>(0.88 to 0.99) | 129                             | 1.04<br>(0.87 to 1.23)    |
| 1                                                       | 623,485   | 691                            | 1.00<br>(0.93 to 1.08) | 106                             | 1.43<br>(1.17 to 1.72)    |
| 2+                                                      | 220,364   | 263                            | 0.92<br>(0.81 to 1.04) | 37                              | 1.12<br>(0.79 to 1.55)    |
| Unrecorded                                              | 332       | 0                              | 0.00<br>(0.0 to 7.13)  | 1                               | 20.00<br>(0.51 to 111.43) |
|                                                         |           | Trend across categories P=0.71 |                        | Trend across categories P=0.21  |                           |
| Any multiple birth as recorded at last cycle completion |           |                                |                        |                                 |                           |
| Yes                                                     | 203,766   | 230                            | 1.16<br>(1.01 to 1.32) | 21                              | 1.04<br>(0.65 to 1.59)    |
| No                                                      | 1,523,258 | 1751                           | 0.93<br>(0.89 to 0.98) | 252                             | 1.19<br>(1.05 to 1.35)    |
| Time since last treatment (years)                       |           |                                |                        |                                 |                           |
| 0-3                                                     | 435,973   | 307                            | 0.98<br>(0.87 to 1.09) | 30                              | 1.18<br>(0.80 to 1.69)    |
| 3-6                                                     | 486,191   | 476                            | 1.03<br>(0.94 to 1.12) | 51                              | 1.24<br>(0.93 to 1.63)    |
| 6-10                                                    | 444,324   | 556                            | 0.94<br>(0.87 to 1.02) | 95                              | 1.52<br>(1.23 to 1.85)    |
| 10-15                                                   | 296,445   | 510                            | 0.93<br>(0.85 to 1.01) | 75                              | 0.98<br>(0.77 to 1.22)    |
| 15+                                                     | 64,091    | 132                            | 0.86<br>(0.72 to 1.02) | 22                              | 0.85<br>(0.54 to 1.29)    |
|                                                         |           | Trend across categories P=0.07 |                        | Trend across categories P=0.07  |                           |

**Table S6- Risk of any ovarian cancer, invasive and borderline ovarian tumours in women with and without endometriosis and or nulliparity, stratified by age at first treatment**

| Factor                                                                                   | Person-years follow-up | Type of ovarian tumour             |                        |                                       |                        |                                          |                        |
|------------------------------------------------------------------------------------------|------------------------|------------------------------------|------------------------|---------------------------------------|------------------------|------------------------------------------|------------------------|
|                                                                                          |                        | All ovarian tumours <sup>II</sup>  |                        | Invasive ovarian tumour <sup>SS</sup> |                        | Borderline ovarian tumour <sup>III</sup> |                        |
|                                                                                          |                        | Observed Cancers                   | SIR (95%CI)            | Observed Cancers                      | SIR (95%CI)            | Observed Cancers                         | SIR (95%CI)            |
| Age at first treatment if at least one risk factor (endometriosis, nulliparity) recorded |                        |                                    |                        |                                       |                        |                                          |                        |
| <25 years                                                                                | 25,787                 | <5                                 | #                      | <5                                    | #                      | <5                                       | #                      |
| 25-29 years                                                                              | 197,309                | 44                                 | 2.84<br>(2.06 to 3.81) | 26                                    | 3.28<br>(2.14 to 4.80) | 18                                       | 2.37<br>(1.40 to 3.74) |
| 30-34 years                                                                              | 448,040                | 97                                 | 1.97<br>(1.60 to 2.40) | 55                                    | 1.86<br>(1.40 to 2.43) | 42                                       | 2.13<br>(1.54 to 2.88) |
| 35-39 years                                                                              | 399,110                | 93                                 | 1.50<br>(1.21 to 1.84) | 70                                    | 1.67<br>(1.30 to 2.11) | 23                                       | 1.15<br>(0.73 to 1.72) |
| 40-44 years                                                                              | 137,314                | 33                                 | 1.11<br>(0.76 to 1.56) | 24                                    | 1.09<br>(0.70 to 1.61) | 9                                        | 1.17<br>(0.54 to 2.23) |
| 45+ years                                                                                | 13,233                 | <5                                 | #                      | <5                                    | #                      | <5                                       | #                      |
|                                                                                          |                        | Trend across categories<br>P<0.001 |                        | Trend across categories<br>P<0.001    |                        | Trend across categories<br>P=0.01        |                        |
| Age at first treatment if no risk factors recorded                                       |                        |                                    |                        |                                       |                        |                                          |                        |
| <25 years                                                                                | 22,400                 | <5                                 | #                      | <5                                    | #                      | <5                                       | #                      |
| 25-29 years                                                                              | 184,655                | 20                                 | 1.42<br>(0.87 to 2.19) | <10                                   | #                      | 11                                       | 1.57<br>(0.78 to 2.80) |
| 30-34 years                                                                              | 418,312                | 45                                 | 1.02<br>(0.75 to 1.37) | 26                                    | 1.01<br>(0.66 to 1.48) | 19                                       | 1.05<br>(0.63 to 1.63) |
| 35-39 years                                                                              | 314,946                | 41                                 | 0.87<br>(0.62 to 1.18) | 27                                    | 0.86<br>(0.57 to 1.25) | 14                                       | 0.89<br>(0.49 to 1.50) |
| 40-44 years                                                                              | 81,453                 | 17                                 | 0.94<br>(0.55 to 1.51) | 16                                    | 1.19<br>(0.68 to 1.93) | <5                                       | #                      |
| 45+ years                                                                                | 15,231                 | <10                                | #                      | 5                                     | 1.21<br>(0.39 to 2.82) | <5                                       | #                      |
|                                                                                          |                        | Trend across categories P=0.07     |                        | Trend across categories<br>P=0.62     |                        | Trend across categories<br>P=0.02        |                        |

## Box S2- Investigation of women with unrecorded cause of infertility

### Investigation of women with unrecorded cause of infertility (n= 11,500)

Women with unrecorded cause of infertility had significantly increased rates of breast, ovarian and corpus uteri cancer. Reasons for this are unclear. Those with unrecorded cause of infertility had treatment more recently, at older ages, with fewer cycles, shorter duration of infertility, more 'freeze-all' cycles (data for 'freeze-all' cycles are available for only a sub-set of our cohort; women who had children after assisted conception between 1992 and 2008). Women with unrecorded cause of infertility had a higher cancer incidence within the first 12 months.

| Variable                                                               | Whole cohort average<br>(95%CI) | Unrecorded cause of<br>infertility cohort average<br>(95%CI) | Test statistic |
|------------------------------------------------------------------------|---------------------------------|--------------------------------------------------------------|----------------|
| First treatment year                                                   | 2002.0<br>(2002.0 to 2002.1)    | 2005.5<br>(2005.4 to 2005.5)                                 | P<0.001        |
| Age at first treatment (years)                                         | 34.4<br>(34.4 to 34.4)          | 36.3<br>(36.2 to 36.4)                                       | P<0.001        |
| Number of treatment cycles                                             | 1.77<br>(1.76 to 1.77)          | 1.51<br>(1.49 to 1.53)                                       | P<0.001        |
| Duration of infertility at last<br>treatment cycle                     | 4.90<br>(4.89 to 4.92)          | 3.69<br>(3.62 to 3.77)                                       | P<0.001        |
| 'Freeze -all' cycle                                                    | 11.9%<br>(11.7 to 12.1)         | 13.2%<br>(12.1 to 14.8)                                      | -              |
| Proportion of cancers diagnosed<br>within 12months of first treatment. | 6.2%<br>(5.3 to 7.0)            | 45.7%<br>(37.5 to 54.0)                                      | P<0.001        |

Therefore excess risk in this sub-group might be due to reverse causation; cancer and/or related treatment causing infertility rather than arising as a result of infertility or its treatment. Whilst we excluded all women with a cancer diagnosis in calendar years before first treatment year, we could not exclude women diagnosed in the same calendar year as first treatment because exact treatment date was unavailable. As some results remained significant after excluding the first 12 months of follow up, there may be further explanations. Unfortunately study regulations preclude inspection of clinical notes to investigate further.

## Table Legends for appendix

Cohort restricted to women who underwent assisted reproduction who were cancer free at least for the first 12 months after the first cycle.

<sup>†</sup> Absolute Excess Risk per 100,000 person years at risk

<sup>‡</sup> 'Breast Cancer'= ICD-9: 1740-9, 2330, 2383; ICD-10: C500-9, D050-9, D486

<sup>§</sup> 'Corpus Uteri Cancer'= ICD-9: 1820-8; ICD-10: C54

<sup>||</sup> 'Ovarian Cancer'= ICD-9: 1830-1839, 2362; ICD-10: C56, C570-C574, C481, C482, D391

<sup>¶</sup> See Supplemental Data for results excluding the first 12 months of follow up.

<sup>††</sup> 'Invasive Breast Cancer'= ICD-9: 1740-9; ICD-10: C500-9

<sup>‡‡</sup> 'In-situ Breast Cancer'= ICD-9: 2330; ICD-10: D050-9

<sup>§§</sup> 'Invasive Ovarian Tumours'= ICD-9: 1830-1839 (excluding morphology codes 8442/8451/8462/8472/8473) 2362; ICD-10: C56, C570-C574, C481, C482 (excluding morphology codes 8442/8451/8462/8472/8473).

<sup>|||</sup> 'Borderline Ovarian Tumours'= ICD-9 1830 (with morphology codes 8442/8451/8462/8472/8473); ICD-10 D391, C56 (with morphology codes 8442/8451/8462/8472/8473).

<sup>#</sup> SIRs suppressed to comply with data disclosure regulations where cells relate to small numbers of individuals. None of the SIRs for affected cells approached significance.

<sup>##</sup> SIR suppressed to comply with data disclosure regulations where cells relate to small numbers of individuals. SIR was significantly lower than age standardised expectation (P=0.014).
